# Supplementary material
Source: ML conference proceedings conference paper supplement (https://openreview.net/forum?id=APkMDZtY9HL)
Supplement: supplementary_material [file attachment]

# INTERPRETABLE OUT-OF-DISTRIBUTION DETECTION USING PATTERN DETECTION - SUPPLEMENTARY MATERIAL -

**Anonymous authors**

Paper under double-blind review

Table 1 and 2 summarize all the experiments that have been carried out in this work. In particular, we also used the CIFAR100 Krizhevsky (2009), with images upsampled to  $224 \times 224$  during our cross-dataset and perturbation experiments, and tested our Particul-based confidence measures with 2 detectors.

## 1 EXPERIMENTS ON CIFAR100

In addition to what has been stated in the main paper regarding the stability of  $C_M^{fssd}$ , this method gives opposite results for Caltech101 v. CIFAR100 (Table 1) depending on the choice of validation OoD dataset: for  $D_{ood, val} = \text{CUB200}$ ,  $C_M^{fssd}$  is a perfect classifier (AUROC=100) between Caltech101 and CIFAR100 inputs, *i.e.*,

$$\forall (x_{iod}, x_{ood}) \in D_{iod} \times D_{ood}, C_M(x_{iod}) > C_M(x_{ood})$$

However, for  $D_{ood, val} = \text{Stanford Cars}$ , the distributions are reversed (AUROC=0), *i.e.*,

$$\forall (x_{iod}, x_{ood}) \in D_{iod} \times D_{ood}, C_M(x_{iod}) < C_M(x_{ood})$$

Note also that for  $D_{iod} = \text{CIFAR100}$ ,  $C_M^{fnrd}$  is a perfect distinguisher *w.r.t.* to other datasets. For all other experiments (cross-dataset OoD with other measures, perturbation OoD detection), the results on CIFAR100 are consistent with the other datasets:

1.  $C_M^{cP}$  performs better than  $C_M^{vP}$  on cross-dataset detection;
2.  $C_M^{fnrd}$  is inversely correlated to blur and brightness changes;
3.  $C_M^{MCP}/C_M^{EB}$  are not correlated to noise.

## 2 INFLUENCE OF THE NUMBER OF DETECTORS

Training 2, 4 or 6 detectors, either globally or per-class, seems to have a small influence on the robustness of our Particul-based confidence measure. Indeed, the additional information (confidence score) provided by an additional detector is usually counter-balanced by the difficulty of learning a new pattern distinct from all the other detectors. This indicates that increasing the number of detectors beyond 6 may become counter-productive during training.

## REFERENCES

Alex Krizhevsky. Learning multiple layers of features from tiny images. Technical report, 2009. 1

| $D_{iod}$     | $D_{ood}$ | Metrics            | OoD-specific            |             |            |        | OoD-agnostic |             |             |                      |                      |                       |                 |                 |                |                      |         |         |
|---------------|-----------|--------------------|-------------------------|-------------|------------|--------|--------------|-------------|-------------|----------------------|----------------------|-----------------------|-----------------|-----------------|----------------|----------------------|---------|---------|
|               |           |                    | FSSD ( $D_{ood, val}$ ) |             |            |        | MCP          | EB          | fNRD        | vanilla Particul     |                      |                       |                 |                 |                | class-based Particul |         |         |
|               |           |                    | CT                      | CB          | SC         | CF     |              |             |             | $P = 2$              | $P = 4$              | $P = 6$               | $P = 2$         | $P = 4$         | $P = 6$        | $P = 2$              | $P = 4$ | $P = 6$ |
| CT            | CB        | AUROC $\uparrow$   | /                       | (95.0)      | 28.6       | 92.5   | <b>87.2</b>  | 83.0        | 46.8        | $71.5 \pm 3.9$       | $72.5 \pm 4.8$       | $71.7 \pm 1.4$        | $74.4 \pm 1.9$  | $72.7 \pm 0.8$  | $69.7 \pm 1.7$ |                      |         |         |
|               |           | AUPR $\uparrow$    | /                       | (88.5)      | 12.1       | 81.6   | <b>77.5</b>  | 70.5        | 17.7        | $43.8 \pm 4.8$       | $44.0 \pm 8.1$       | $47.3 \pm 4.6$        | $41.5 \pm 1.8$  | $38.6 \pm 2.3$  | $33.9 \pm 2.4$ |                      |         |         |
|               |           | FPR80 $\downarrow$ | /                       | (04.5)      | 94.5       | 09.8   | <b>22.1</b>  | 34.1        | 86.3        | $54.8 \pm 5.1$       | $49.9 \pm 7.6$       | $57.3 \pm 1.8$        | $47.4 \pm 3.4$  | $49.5 \pm 1.1$  | $54.6 \pm 2.2$ |                      |         |         |
|               | SC        | AUROC $\uparrow$   | /                       | 41.3        | (78.0)     | 46.4   | <b>85.3</b>  | 84.0        | 70.1        | $52.2 \pm 10.7$      | $47.3 \pm 10.5$      | $41.0 \pm 2.4$        | $63.4 \pm 3.1$  | $67.1 \pm 0.6$  | $67.0 \pm 2.8$ |                      |         |         |
|               |           | AUPR $\uparrow$    | /                       | 15.3        | (49.2)     | 13.5   | <b>71.8</b>  | 67.1        | 44.8        | $23.6 \pm 8.3$       | $19.9 \pm 8.6$       | $16.6 \pm 3.5$        | $20.6 \pm 2.2$  | $24.0 \pm 1.0$  | $24.4 \pm 2.3$ |                      |         |         |
|               |           | FPR80 $\downarrow$ | /                       | 96.4        | (45.2)     | 83.9   | <b>26.9</b>  | 32.5        | 68.1        | $86.4 \pm 12.4$      | $88.9 \pm 6.0$       | $95.5 \pm 1.5$        | $62.9 \pm 4.1$  | $58.1 \pm 0.8$  | $60.5 \pm 4.2$ |                      |         |         |
|               | CF        | AUROC $\uparrow$   | /                       | <b>100</b>  | <b>0.0</b> | (100)  | 87.1         | 71.7        | 11.9        | $85.7 \pm 5.5$       | $93.1 \pm 2.3$       | <b>96.1</b> $\pm 1.3$ | $91.3 \pm 0.2$  | $92.1 \pm 2.2$  | $91.0 \pm 2.0$ |                      |         |         |
|               |           | AUPR $\uparrow$    | /                       | <b>99.9</b> | <b>6.0</b> | (99.7) | 74.2         | 54.7        | 6.4         | $56.1 \pm 13.5$      | $73.2 \pm 8.1$       | <b>82.7</b> $\pm 4.4$ | $67.6 \pm 0.7$  | $70.3 \pm 8.3$  | $66.7 \pm 4.6$ |                      |         |         |
|               |           | FPR80 $\downarrow$ | /                       | <b>0.0</b>  | <b>100</b> | (0.0)  | 22.2         | 72.6        | 97.1        | $27.5 \pm 10.6$      | $10.5 \pm 5.1$       | <b>5.5</b> $\pm 2.4$  | $14.4 \pm 1.0$  | $11.9 \pm 4.6$  | $14.9 \pm 4.3$ |                      |         |         |
| CF            | CT        | AUROC $\uparrow$   | (99.4)                  | 99.2        | 99.3       | /      | 69.1         | 67.0        | <b>100</b>  | $68.6 \pm 0.3$       | $62.2 \pm 1.1$       | $59.2 \pm 2.1$        | $68.1 \pm 0.7$  | $66.6 \pm 0.8$  | $66.4 \pm 1.0$ |                      |         |         |
|               |           | AUPR $\uparrow$    | (99.9)                  | 99.7        | 99.9       | /      | 94.6         | 94.4        | <b>100</b>  | $94.4 \pm 0.1$       | $92.7 \pm 0.1$       | $91.8 \pm 0.6$        | $93.9 \pm 0.4$  | $93.5 \pm 0.2$  | $93.3 \pm 0.2$ |                      |         |         |
|               |           | FPR80 $\downarrow$ | (0.6)                   | 0.7         | 0.5        | /      | 62.7         | 69.0        | <b>0</b>    | $60.6 \pm 0.4$       | $69.5 \pm 2.2$       | $73.1 \pm 2.2$        | $57.0 \pm 1.5$  | $59.2 \pm 1.9$  | $59.2 \pm 2.7$ |                      |         |         |
|               | CB        | AUROC $\uparrow$   | 96.0                    | (96.6)      | 92.9       | /      | 70.1         | 69.5        | <b>99.9</b> | $68.9 \pm 2.1$       | $67.5 \pm 6.0$       | $62.6 \pm 4.4$        | $72.3 \pm 2.3$  | $70.2 \pm 0.8$  | $67.2 \pm 1.2$ |                      |         |         |
|               |           | AUPR $\uparrow$    | 97.4                    | (97.8)      | 95.1       | /      | 81.8         | 81.2        | <b>100</b>  | $79.5 \pm 1.6$       | $77.8 \pm 4.7$       | $72.1 \pm 3.8$        | $81.1 \pm 1.7$  | $80.1 \pm 0.8$  | $77.0 \pm 0.9$ |                      |         |         |
|               |           | FPR80 $\downarrow$ | 5.9                     | (4.6)       | 11.3       | /      | 61.6         | 61.9        | <b>0</b>    | $58.3 \pm 3.2$       | $58.6 \pm 9.7$       | $64.4 \pm 3.8$        | $48.7 \pm 2.6$  | $56.1 \pm 2.6$  | $58.8 \pm 3.0$ |                      |         |         |
|               | SC        | AUROC $\uparrow$   | 99.9                    | 99.6        | (99.9)     | /      | 65.5         | 66.0        | <b>100</b>  | $54.2 \pm 0.7$       | $55.9 \pm 2.6$       | $49.5 \pm 6.0$        | $73.4 \pm 2.6$  | $78.6 \pm 3.0$  | $77.9 \pm 2.6$ |                      |         |         |
|               |           | AUPR $\uparrow$    | 99.9                    | 99.7        | (99.9)     | /      | 72.4         | 73.7        | <b>100</b>  | $65.1 \pm 1.1$       | $65.2 \pm 2.2$       | $58.1 \pm 5.2$        | $79.3 \pm 2.0$  | $82.6 \pm 2.9$  | $82.2 \pm 1.7$ |                      |         |         |
|               |           | FPR80 $\downarrow$ | 0                       | 0.1         | (0)        | /      | 68.8         | 67.9        | <b>0</b>    | $85.6 \pm 1.3$       | $81.4 \pm 2.8$       | $86.1 \pm 5.5$        | $52.6 \pm 5.6$  | $40.2 \pm 6.2$  | $41.9 \pm 5.8$ |                      |         |         |
| CUB200        | CT        | AUROC $\uparrow$   | (94.7)                  | /           | 94.5       | 78.5   | <b>96.1</b>  | 94.0        | 72.1        | $94.2 \pm 1.8$       | $91.8 \pm 3.3$       | $93.7 \pm 0.4$        | $88.7 \pm 4.2$  | $93.6 \pm 0.3$  | $93.1 \pm 2.0$ |                      |         |         |
|               |           | AUPR $\uparrow$    | (98.3)                  | /           | 98.3       | 92.8   | <b>99.1</b>  | 98.2        | 91.5        | $98.1 \pm 0.7$       | $97.5 \pm 0.8$       | $97.7 \pm 0.2$        | $96.4 \pm 1.3$  | $98.3 \pm 0.1$  | $98.1 \pm 0.6$ |                      |         |         |
|               |           | FPR80 $\downarrow$ | (7.0)                   | /           | 6.4        | 35.9   | <b>5.1</b>   | 8.5         | 52.8        | $9.1 \pm 3.3$        | $12.9 \pm 5.7$       | $9.5 \pm 1.3$         | $19.2 \pm 8.4$  | $9.4 \pm 1.6$   | $12.8 \pm 5.0$ |                      |         |         |
|               | SC        | AUROC $\uparrow$   | 98.6                    | /           | (99.3)     | 84.7   | 98.8         | 97.1        | 88.5        | $98.7 \pm 0.7$       | $97.9 \pm 1.8$       | <b>99.1</b> $\pm 0.1$ | $92.7 \pm 6.0$  | $94.4 \pm 3.9$  | $97.5 \pm 1.6$ |                      |         |         |
|               |           | AUPR $\uparrow$    | 98.6                    | /           | (98.9)     | 84.1   | <b>98.6</b>  | 96.9        | 88.8        | $98.0 \pm 1.0$       | $97.3 \pm 1.9$       | <b>98.6</b> $\pm 0.1$ | $90.5 \pm 6.3$  | $93.5 \pm 4.6$  | $96.0 \pm 2.0$ |                      |         |         |
|               |           | FPR80 $\downarrow$ | 0.4                     | /           | (0.5)      | 25.8   | <b>0.4</b>   | 1.5         | 18.0        | $1.4 \pm 0.6$        | $1.9 \pm 1.5$        | $0.9 \pm 0.1$         | $13.3 \pm 13.2$ | $7.9 \pm 8.5$   | $4.9 \pm 4.6$  |                      |         |         |
|               | CF        | AUROC $\uparrow$   | 68.0                    | /           | 80.9       | (97.6) | <b>98.0</b>  | 82.8        | 71.0        | $93.4 \pm 1.9$       | $92.3 \pm 0.7$       | $94.2 \pm 1.7$        | $90.8 \pm 4.9$  | $94.3 \pm 1.0$  | $96.5 \pm 0.1$ |                      |         |         |
|               |           | AUPR $\uparrow$    | 48.7                    | /           | 66.9       | (96.1) | <b>97.4</b>  | 70.9        | 68.2        | $88.8 \pm 3.4$       | $86.1 \pm 0.6$       | $88.5 \pm 3.3$        | $83.1 \pm 9.3$  | $91.2 \pm 1.7$  | $94.7 \pm 0.3$ |                      |         |         |
|               |           | FPR80 $\downarrow$ | 52.1                    | /           | 31.6       | (2.4)  | <b>1.0</b>   | 28.2        | 68.7        | $10.9 \pm 3.1$       | $12.2 \pm 1.0$       | $8.9 \pm 2.9$         | $15.0 \pm 9.0$  | $9.2 \pm 1.6$   | $4.3 \pm 0.8$  |                      |         |         |
| Stanford Cars | CT        | AUROC $\uparrow$   | (99.9)                  | 99.1        | /          | 98.1   | 96.7         | <b>98.9</b> | 45.5        | $97.5 \pm 1.1$       | $97.4 \pm 1.9$       | $98.4 \pm 0.6$        | $85.2 \pm 12.4$ | $86.8 \pm 1.6$  | $94.0 \pm 3.3$ |                      |         |         |
|               |           | AUPR $\uparrow$    | (100)                   | 99.8        | /          | 99.6   | 99.4         | <b>99.7</b> | 83.1        | $99.5 \pm 0.2$       | $99.5 \pm 0.4$       | <b>99.7</b> $\pm 0.1$ | $97.0 \pm 2.5$  | $97.5 \pm 0.4$  | $98.9 \pm 0.7$ |                      |         |         |
|               |           | FPR80 $\downarrow$ | (0.1)                   | 0.8         | /          | 2.0    | 1.9          | <b>0.6</b>  | 79.0        | $3.9 \pm 2.2$        | $3.9 \pm 2.9$        | $1.8 \pm 0.7$         | $29.1 \pm 25.6$ | $21.0 \pm 6.8$  | $8.0 \pm 5.5$  |                      |         |         |
|               | CB        | AUROC $\uparrow$   | 100                     | (99.9)      | /          | 99.9   | 97.6         | 99.6        | 51.8        | $99.3 \pm 0.5$       | $99.6 \pm 0.5$       | <b>99.8</b> $\pm 0.2$ | $79.4 \pm 21.9$ | $95.4 \pm 0.8$  | $97.0 \pm 0.9$ |                      |         |         |
|               |           | AUPR $\uparrow$    | 100                     | (99.9)      | /          | 99.9   | 98.0         | 99.7        | 56.6        | $99.5 \pm 0.3$       | $99.7 \pm 0.3$       | <b>99.9</b> $\pm 0.1$ | $91.4 \pm 4.2$  | $96.7 \pm 0.7$  | $97.9 \pm 0.7$ |                      |         |         |
|               |           | FPR80 $\downarrow$ | 0                       | (0)         | /          | 0      | 3.7          | 0.4         | 72.5        | $0.4 \pm 0.4$        | $0.1 \pm 0.1$        | <b>0.0</b> $\pm 0.1$  | $20.2 \pm 9.6$  | $7.2 \pm 2.9$   | $2.7 \pm 0.9$  |                      |         |         |
|               | CF        | AUROC $\uparrow$   | 100                     | 100         | /          | (100)  | 92.9         | 93.9        | 39.0        | <b>100</b> $\pm 0.0$ | <b>100</b> $\pm 0.1$ | <b>100</b> $\pm 0.0$  | $87.5 \pm 11.7$ | $85.9 \pm 14.2$ | $93.5 \pm 5.0$ |                      |         |         |
|               |           | AUPR $\uparrow$    | 100                     | 100         | /          | (100)  | 94.0         | 94.3        | 39.3        | <b>100</b> $\pm 0.0$ | $99.9 \pm 0.1$       | <b>100</b> $\pm 0.0$  | $86.2 \pm 12.4$ | $85.7 \pm 14.2$ | $94.1 \pm 4.1$ |                      |         |         |
|               |           | FPR80 $\downarrow$ | 0                       | 0           | /          | (0)    | 3.9          | 5.4         | 87.6        | <b>0.0</b> $\pm 0.0$ | <b>0.0</b> $\pm 0.0$ | <b>0.0</b> $\pm 0.0$  | $24.2 \pm 20.3$ | $19.9 \pm 26.3$ | $10.6 \pm 9.4$ |                      |         |         |

Table 1: AUROC $\uparrow$ , AUPR $\uparrow$  and FPR80 $\downarrow$  scores for different pairs ( $D_{iod}, D_{ood}$ ). For readability, all scores are given on a 0-100 scale. SC denotes StanfordCars, CB denotes CUB200, CT denotes Caltech101 and CF denotes CIFAR100. The thick vertical line separates FSSD (OoD-specific) from all other agnostic methods. The double horizontal line separates experiments where  $D_{iod}$  is heterogeneous (Caltech101 and CIFAR100, top) or homogeneous (CUB200 and Stanford Cars, bottom). For FSSD scores, we indicate the validation dataset  $D_{ood, val}$  used during the calibration, and scores in parenthesis correspond to the optimal case  $D_{ood, val} \sim D_{ood}$ . In red, we highlight the contradictory results obtained when using two different validation datasets during the linear regression phase of the FSSD calibration. For Particul-based measures, we provide the scores averaged over 3 random initializations of the detectors along with corresponding unbiased standard deviation. For OoD-agnostic approaches, we indicate in bold the best performing measure for each experiment and each metric. Best viewed in color.

| Pert. $P$          | Arch. | $\mathcal{D}_{iod}$ | MCP   | EB    | fNRD  | vanilla Particul |                  |                  | class-based Particul |                  |                  |
|--------------------|-------|---------------------|-------|-------|-------|------------------|------------------|------------------|----------------------|------------------|------------------|
|                    |       |                     |       |       |       | $P = 2$          | $P = 4$          | $P = 6$          | $P = 2$              | $P = 4$          | $P = 6$          |
| Blur (-)           | CT    | Resnet50            | -1.00 | -0.85 | 1.00  | -0.18 $\pm$ 1.02 | -0.91 $\pm$ 0.06 | -0.95 $\pm$ 0.00 | -0.96 $\pm$ 0.03     | -0.95 $\pm$ 0.00 | -0.95 $\pm$ 0.00 |
|                    | CF    | Resnet50            | -0.95 | -0.95 | 1.00  | -0.98 $\pm$ 0.03 | -1.00 $\pm$ 0.00 | -1.00 $\pm$ 0.00 | -0.95 $\pm$ 0.00     | -0.95 $\pm$ 0.00 | -0.95 $\pm$ 0.00 |
|                    | CB    | Resnet50            | -0.90 | 0.61  | 1.00  | 0.95 $\pm$ 0.00  | 0.95 $\pm$ 0.00  | 0.95 $\pm$ 0.00  | 0.96 $\pm$ 0.03      | 0.95 $\pm$ 0.00  | 1.00 $\pm$ 0.00  |
|                    | SC    | VGG19               | -0.86 | -1.00 | 1.00  | -0.95 $\pm$ 0.05 | -1.00 $\pm$ 0.00 | -1.00 $\pm$ 0.00 | -0.91 $\pm$ 0.03     | -1.00 $\pm$ 0.00 | -0.96 $\pm$ 0.06 |
| Noise (-)          | CT    | Resnet50            | -1.00 | -0.95 | 1.00  | -0.86 $\pm$ 0.03 | -0.25 $\pm$ 0.60 | 0.50 $\pm$ 0.14  | -0.85 $\pm$ 0.00     | -0.85 $\pm$ 0.00 | -0.86 $\pm$ 0.03 |
|                    | CF    | Resnet50            | 0.05  | 0.50  | -1.00 | -1.00 $\pm$ 0.00 | -1.00 $\pm$ 0.00 | -1.00 $\pm$ 0.00 | -0.98 $\pm$ 0.01     | -1.00 $\pm$ 0.00 | -1.00 $\pm$ 0.00 |
|                    | CB    | Resnet50            | -0.07 | 0.64  | -1.00 | -0.83 $\pm$ 0.05 | -0.96 $\pm$ 0.03 | -0.98 $\pm$ 0.00 | -0.87 $\pm$ 0.10     | -0.90 $\pm$ 0.06 | -0.96 $\pm$ 0.05 |
|                    | SC    | VGG19               | -0.24 | 0.12  | -1.00 | -0.66 $\pm$ 0.05 | -0.69 $\pm$ 0.00 | -0.68 $\pm$ 0.08 | -0.73 $\pm$ 0.10     | -0.78 $\pm$ 0.10 | -0.67 $\pm$ 0.08 |
| Brightness (+)     | CT    | Resnet50            | -1.00 | -1.00 | -1.00 | -0.98 $\pm$ 0.01 | -1.00 $\pm$ 0.00 | -1.00 $\pm$ 0.00 | -0.90 $\pm$ 0.12     | -0.92 $\pm$ 0.06 | -0.97 $\pm$ 0.05 |
|                    | CF    | Resnet50            | -0.29 | -0.29 | -1.00 | -0.75 $\pm$ 0.07 | -0.77 $\pm$ 0.03 | -0.82 $\pm$ 0.01 | -0.93 $\pm$ 0.04     | -0.61 $\pm$ 0.61 | -0.93 $\pm$ 0.12 |
|                    | CB    | Resnet50            | 0.98  | 1.00  | -1.00 | 1.00 $\pm$ 0.00  | 0.97 $\pm$ 0.04  | 0.98 $\pm$ 0.04  | 1.00 $\pm$ 0.00      | 1.00 $\pm$ 0.00  | 1.00 $\pm$ 0.00  |
|                    | SC    | Resnet50            | 0.98  | 1.00  | -1.00 | 0.96 $\pm$ 0.03  | 0.99 $\pm$ 0.01  | 0.97 $\pm$ 0.04  | 0.98 $\pm$ 0.01      | 0.98 $\pm$ 0.00  | 0.98 $\pm$ 0.00  |
| Rotation forth (-) | CT    | Resnet50            | 1.00  | 1.00  | -0.31 | -0.20 $\pm$ 0.06 | -0.01 $\pm$ 0.52 | 0.23 $\pm$ 0.11  | 0.94 $\pm$ 0.05      | 0.78 $\pm$ 0.20  | 0.67 $\pm$ 0.20  |
|                    | CF    | Resnet50            | 0.98  | 1.00  | -0.98 | 1.00 $\pm$ 0.00  | 1.00 $\pm$ 0.00  | 1.00 $\pm$ 0.00  | 1.00 $\pm$ 0.00      | 1.00 $\pm$ 0.00  | 1.00 $\pm$ 0.00  |
|                    | CB    | Resnet50            | 1.00  | 1.00  | -1.00 | 1.00 $\pm$ 0.00  | 0.98 $\pm$ 0.03  | 0.90 $\pm$ 0.18  | 1.00 $\pm$ 0.00      | 1.00 $\pm$ 0.00  | 1.00 $\pm$ 0.00  |
|                    | SC    | Resnet50            | 1.00  | 1.00  | -1.00 | 1.00 $\pm$ 0.00  | 0.98 $\pm$ 0.03  | 0.90 $\pm$ 0.18  | 1.00 $\pm$ 0.00      | 1.00 $\pm$ 0.00  | 1.00 $\pm$ 0.00  |
| Rotation back (+)  | CT    | Resnet50            | -0.30 | -0.28 | -0.24 | -0.46 $\pm$ 0.01 | -0.41 $\pm$ 0.18 | -0.42 $\pm$ 0.05 | -0.26 $\pm$ 0.20     | -0.51 $\pm$ 0.08 | -0.52 $\pm$ 0.07 |
|                    | CF    | Resnet50            | -0.76 | -0.37 | -0.19 | -0.79 $\pm$ 0.05 | -0.79 $\pm$ 0.07 | -0.53 $\pm$ 0.14 | -0.75 $\pm$ 0.03     | -0.81 $\pm$ 0.06 | -0.74 $\pm$ 0.04 |
|                    | CB    | Resnet50            | -0.95 | -0.89 | -0.42 | -0.94 $\pm$ 0.00 | -0.82 $\pm$ 0.20 | -0.94 $\pm$ 0.01 | -0.92 $\pm$ 0.01     | -0.94 $\pm$ 0.01 | -0.93 $\pm$ 0.00 |
|                    | SC    | VGG19               | -0.95 | -0.94 | -0.42 | -0.95 $\pm$ 0.00 | -0.95 $\pm$ 0.00 | -0.95 $\pm$ 0.00 | -0.95 $\pm$ 0.00     | -0.95 $\pm$ 0.00 | -0.95 $\pm$ 0.00 |
| Rotation back (+)  | CT    | Resnet50            | -0.76 | -0.76 | -0.56 | -0.70 $\pm$ 0.02 | -0.71 $\pm$ 0.06 | -0.67 $\pm$ 0.09 | -0.84 $\pm$ 0.13     | -0.86 $\pm$ 0.08 | -0.89 $\pm$ 0.08 |
|                    | CF    | Resnet50            | 0.52  | 0.65  | 0.20  | 0.41 $\pm$ 0.07  | 0.51 $\pm$ 0.09  | 0.44 $\pm$ 0.09  | 0.67 $\pm$ 0.10      | 0.68 $\pm$ 0.10  | 0.73 $\pm$ 0.06  |
|                    | CB    | Resnet50            | 0.75  | 0.38  | -0.02 | 0.79 $\pm$ 0.11  | 0.72 $\pm$ 0.15  | 0.62 $\pm$ 0.35  | 0.91 $\pm$ 0.02      | 0.88 $\pm$ 0.02  | 0.71 $\pm$ 0.08  |
|                    | SC    | Resnet50            | 0.95  | 0.90  | 0.32  | 0.95 $\pm$ 0.00  | 0.77 $\pm$ 0.32  | 0.94 $\pm$ 0.01  | 0.98 $\pm$ 0.03      | 0.98 $\pm$ 0.03  | 0.98 $\pm$ 0.03  |
| Rotation back (+)  | CT    | Resnet50            | 0.95  | 0.93  | 0.35  | 0.94 $\pm$ 0.01  | 0.94 $\pm$ 0.01  | 0.92 $\pm$ 0.01  | 0.94 $\pm$ 0.01      | 0.92 $\pm$ 0.01  | 0.92 $\pm$ 0.01  |
|                    | CF    | Resnet50            | 0.72  | 0.72  | 0.32  | 0.69 $\pm$ 0.05  | 0.78 $\pm$ 0.06  | 0.74 $\pm$ 0.03  | 0.84 $\pm$ 0.03      | 0.84 $\pm$ 0.05  | 0.89 $\pm$ 0.07  |
|                    | CB    | Resnet50            | 0.72  | 0.72  | 0.32  | 0.69 $\pm$ 0.05  | 0.78 $\pm$ 0.06  | 0.74 $\pm$ 0.03  | 0.84 $\pm$ 0.03      | 0.84 $\pm$ 0.05  | 0.89 $\pm$ 0.07  |
|                    | SC    | Resnet50            | 0.72  | 0.72  | 0.32  | 0.69 $\pm$ 0.05  | 0.78 $\pm$ 0.06  | 0.74 $\pm$ 0.03  | 0.84 $\pm$ 0.03      | 0.84 $\pm$ 0.05  | 0.89 $\pm$ 0.07  |

Table 2: Spearman rank correlation coefficient between the intensity  $\lambda$  of a perturbation applied to dataset  $\mathcal{D}$  and the average confidence measure  $\Gamma(C_M, \mathcal{D}, P, \lambda)$  computed over the dataset. For each perturbation  $P$ , the expected correlation sign is recalled in parenthesis. In **red**, we highlight experiments where the distributions are either uncorrelated (small correlation coefficient), inversely correlated (opposite coefficient sign) or unstable (high standard deviation for Particul-based measures). Best viewed in color.
